# Supplementary material
Source: Springer Nature journal article supplement (https://www.springermedizin.de/resource/supplementary/12888_2011_908_MOESM1_ESM.pdf/9478502)

## Enrollment

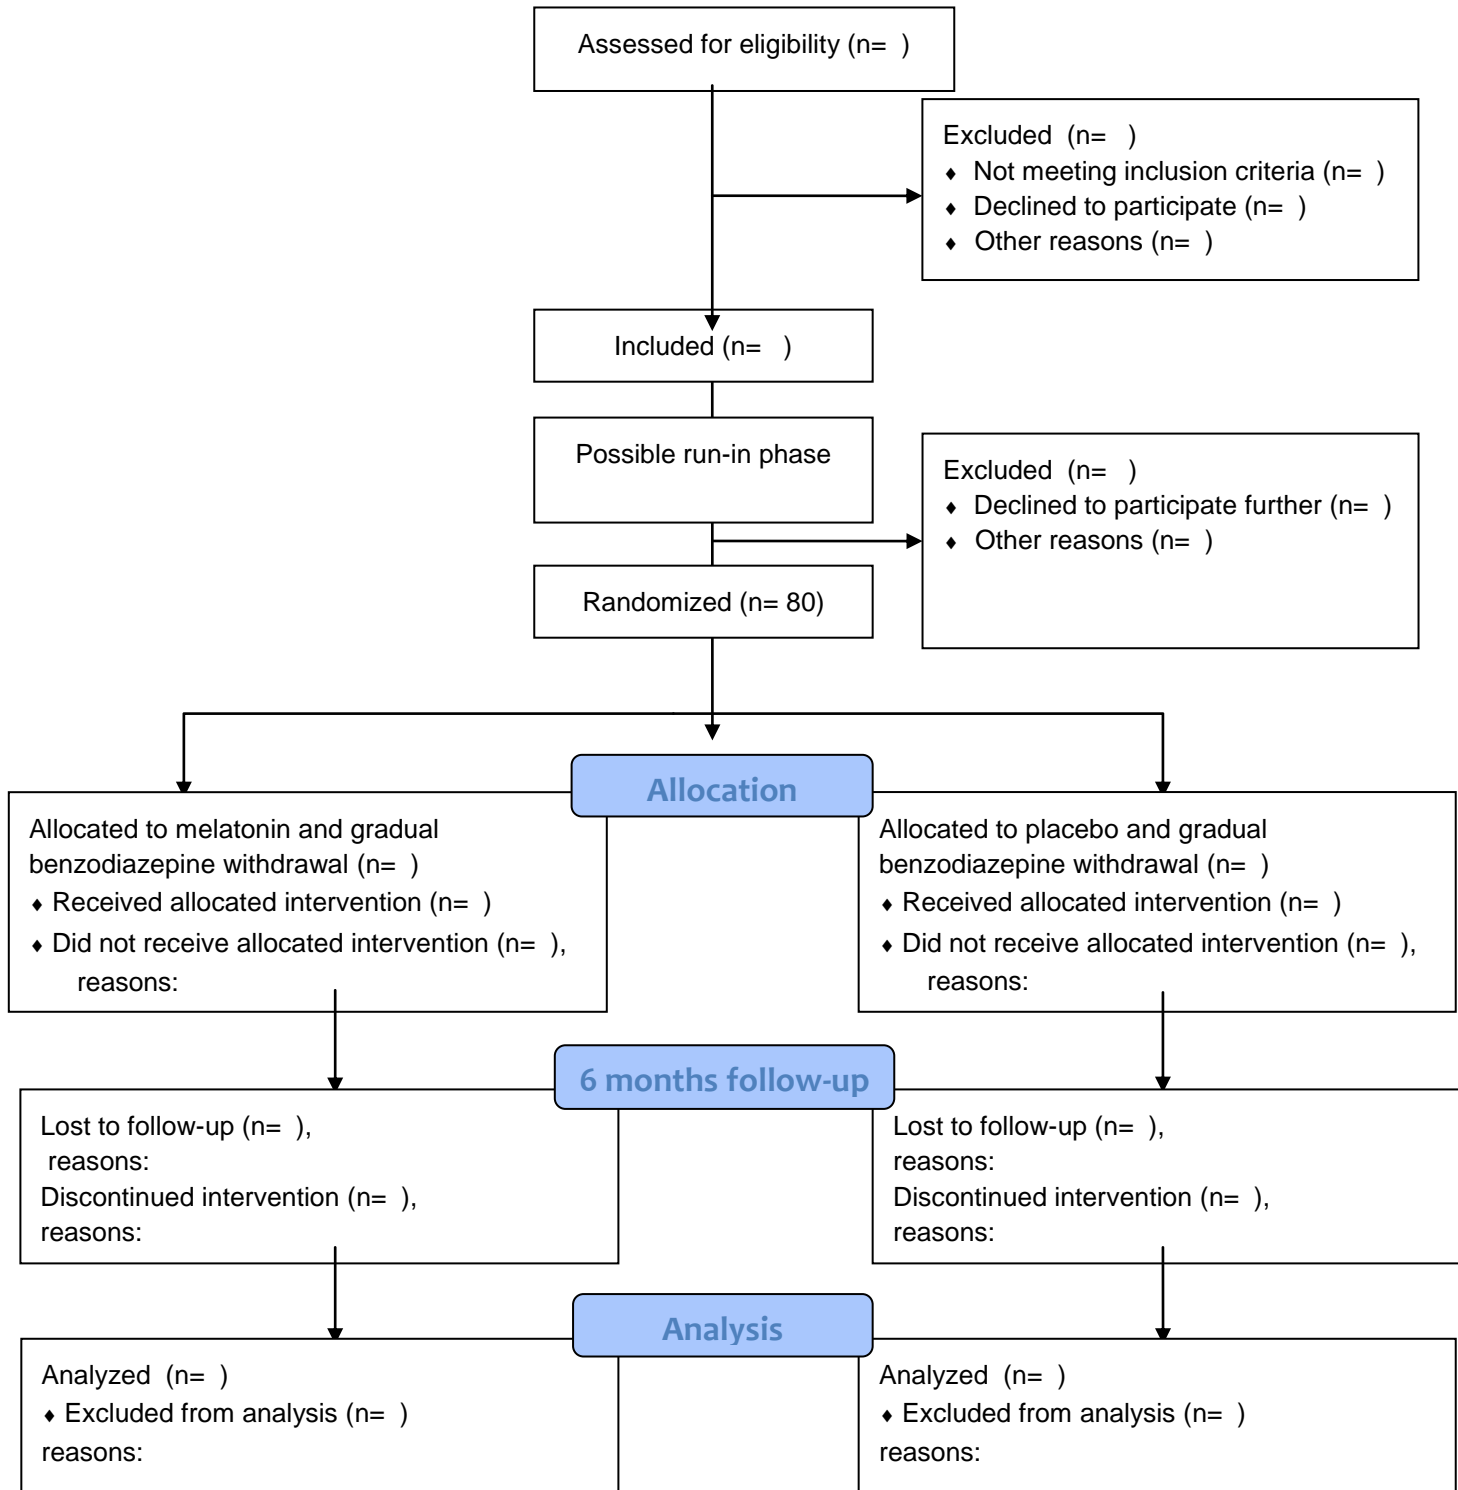

Supplement: MOESM1 [file 9478502]
